# Supplementary material
Source: PubMed Central journal article supplement (PMC6738875)
Supplement: jin-0009-0145-s01.pdf [file jin-0009-0145-s01.pdf]

**Supplemental Figures**

**Supplement Figure 1: Number of differentially expressed probe sets.**

The number of differentially expressed probe sets exhibiting a log<sub>2</sub>-fold change of >1 (>2-fold change) and an adjusted p-value of <0.05 between infected and mock-infected mice for WT (WT), single *Irf3*<sup>-/-</sup> (*Irf3*) and *Irf7*<sup>-/-</sup> (*Irf7*) KO, and *Irf3*<sup>-/-</sup>*Irf7*<sup>-/-</sup>-DKO (*Irf3/7*) mice at day 3 pi with 2x10<sup>3</sup> FFU PR8M were determined by LIMMA. Up-regulated probe sets are shown in red, down-regulated in blue. n = 3 for all groups.

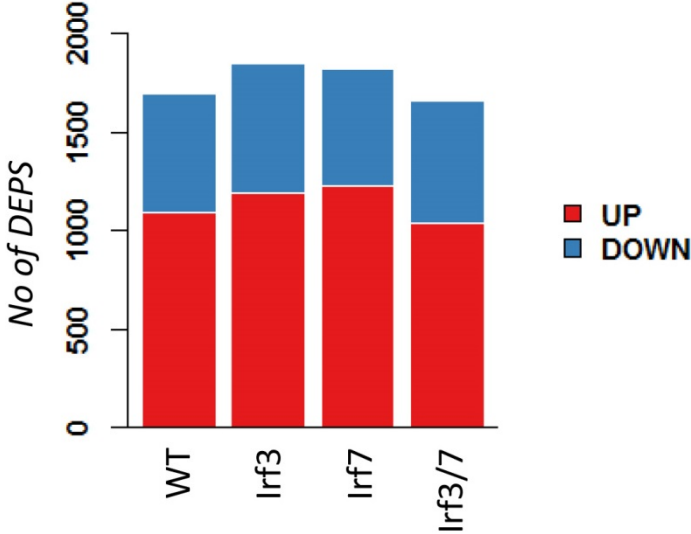

**Supplement Figure 2: Quantitative analysis of epithelial cell damage and cellular infiltrates in histological sections.**

Five WT C57BL/6J and four *Irf3<sup>-/-</sup>Irf7<sup>-/-</sup>* DKO female mice at the age of 8-12 weeks were infected intranasally with  $2 \times 10^5$  FFU PR8M (H1N1) influenza A virus. The percentage of bronchiolar structures affected by epithelial cell necrosis (a) and the ratio of monocyctic to granulocytic infiltration (b) were determined on sections stained with haematoxylin/eosin. The number of virus infected bronchiolar epithelial cells was counted on sections immunohistochemically stained with an anti-influenza nucleoprotein antibody (c). Data represents mean values  $\pm$  SEM. *Irf3<sup>-/-</sup>Irf7<sup>-/-</sup>* mice showed significantly higher epithelial damage and infiltration of granulocytic cells compared to WT mice as well as significantly more virus infected cells ( $*p < 0.05$ ). Significances were calculated using Mann-Whitney U tests. *Irf3/7<sup>-/-</sup>*: *Irf3<sup>-/-</sup>Irf7<sup>-/-</sup>* mutant genotypes.

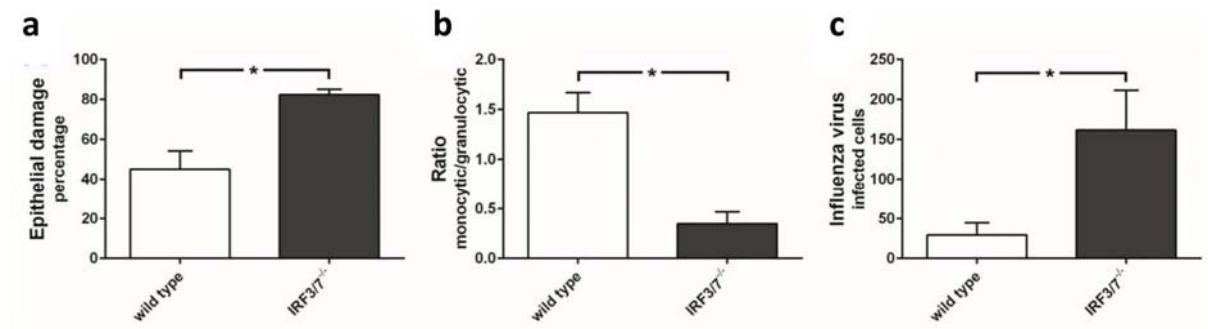

**Supplement Figure 3: Gene expression changes for individual genes.**

Changes in the expression levels of probe sets representing interferon genes (*Ifn*'s) (a,b) and interferon-stimulated genes (*Isg*'s, *Ifit*'s, *Ifitm*'s, *Mx*'s, *Oas*'s) (c-f) in lungs of WT, single KO and DKO mice infected with  $2 \times 10^3$  FFU PR8M at day 3 pi. Expression values represent normalized  $\log_2$  transformed signal intensities relative to expression levels in mock-infected control mice at day 3 post treatment. n = 3 for all groups. md3: mock infected mice at day3 post treatment, d3 and d5: infected mice at day 3 and 5 p.i., respectively. wt, wild type; *Irf3*, *Irf3*<sup>-/-</sup>; *Irf7*: *Irf7*<sup>-/-</sup> and *Irf37*: *Irf3*<sup>-/-</sup>*Irf7*<sup>-/-</sup> genotypes, respectively.

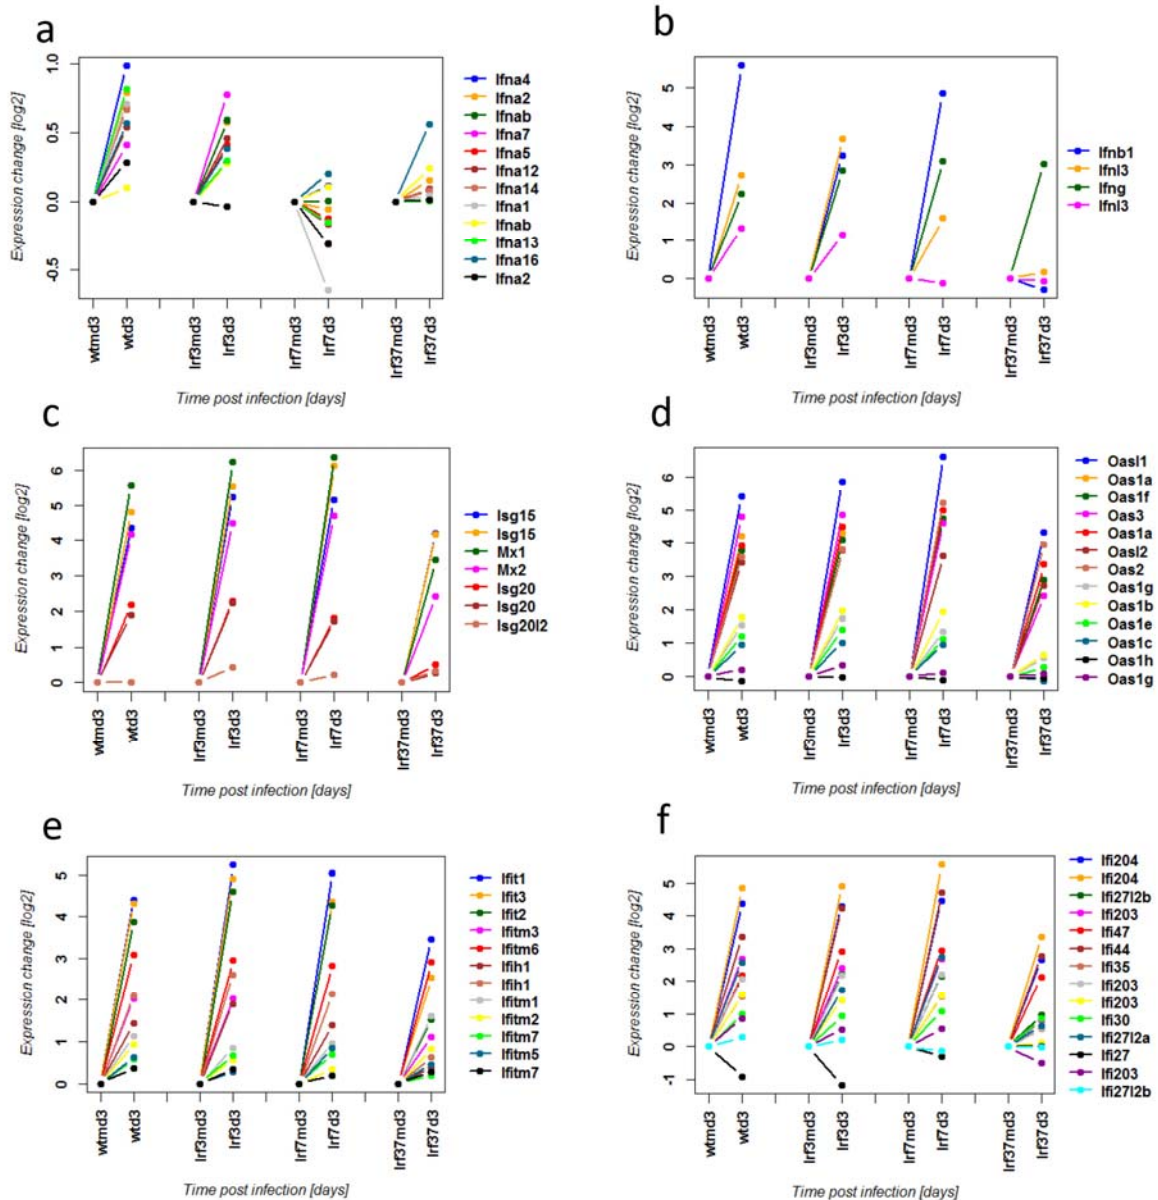

**Supplement Figure 4: Validation of gene expression changes by quantitative RT-PCR.**

The y-axis shows the fold-change as  $\log_2$  using the  $\Delta\Delta CT$  method from qRT-PCR analyses of selected genes from the host chemokine-cytokine, interferon-stimulated genes (ISGs), JNK pathway and adaptive immune response. All genes tested showed the same trends of up- or down-regulation in DKO mutants, except for *Atf2* where a difference was seen for the delta-DKO-minus-WT values (0.223 in arrays and -0.066 in qRT-PCR). md3: mock infected mice at day3 post treatment, d3 and d5: infected mice at day 3 and 5 p.i., respectively. WT, wild type; *Irf3*: *Irf3*<sup>-/-</sup>; *Irf7*: *Irf7*<sup>-/-</sup> and *Irf3x7*: *Irf3*<sup>-/-</sup>*Irf7*<sup>-/-</sup> genotypes, respectively

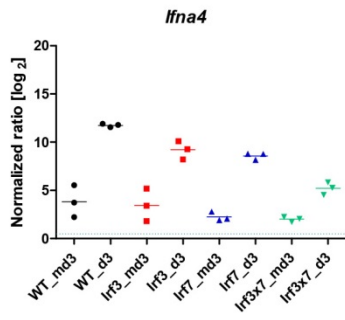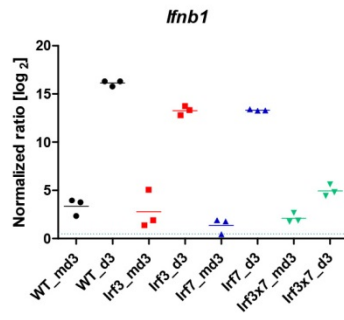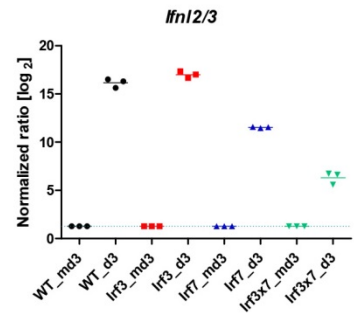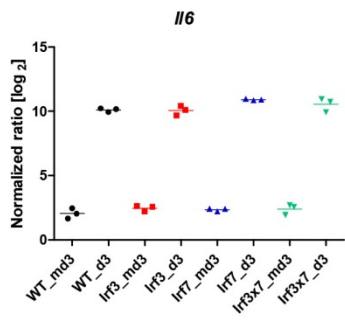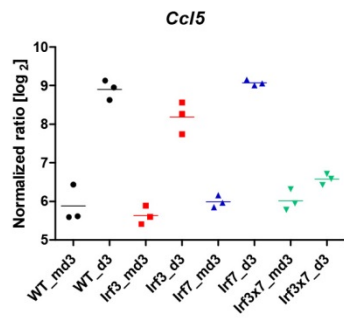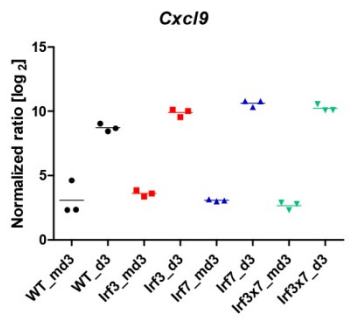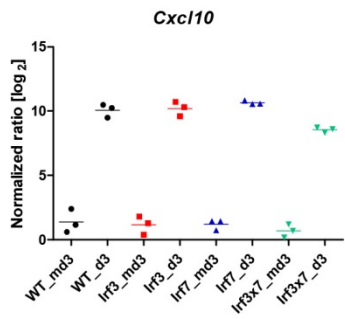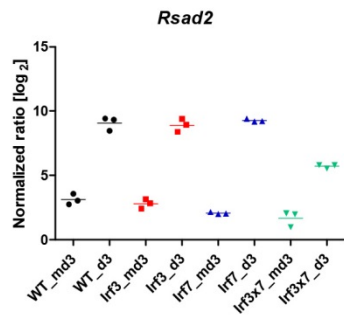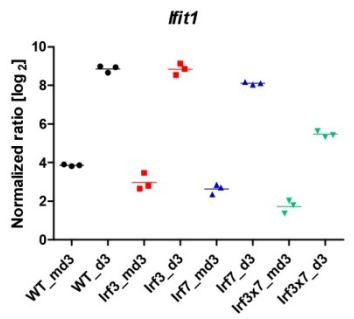

● C57BL/6J mice  
 ■ *Irf3*<sup>-/-</sup> mice

▲ *Irf7*<sup>-/-</sup> mice  
 ▼ *Irf3*<sup>-/-</sup>*xIrf7*<sup>-/-</sup> mice

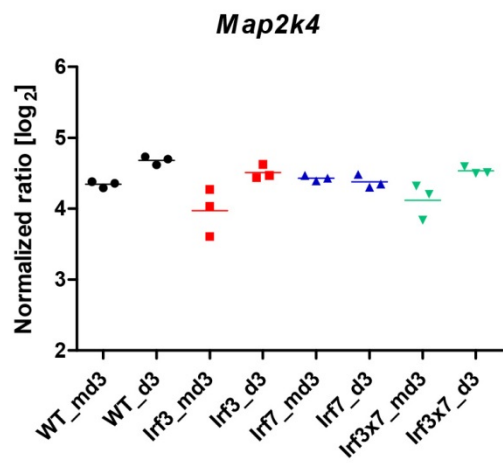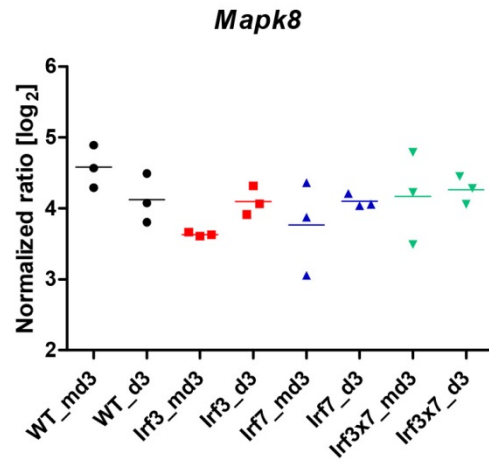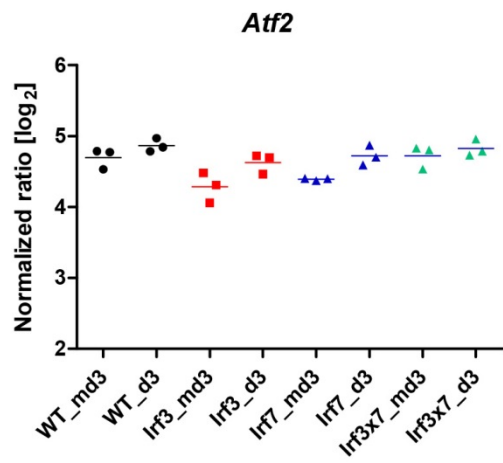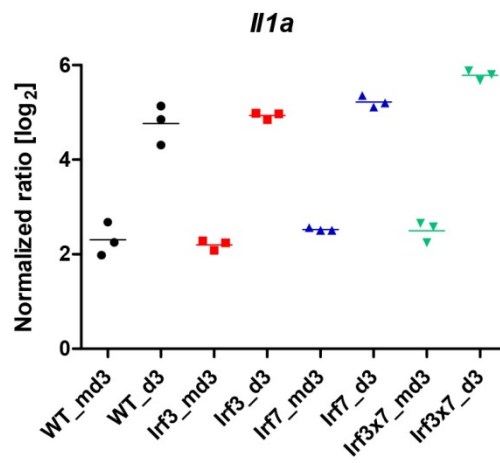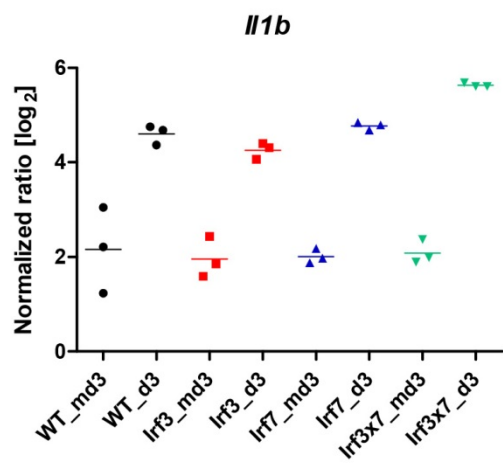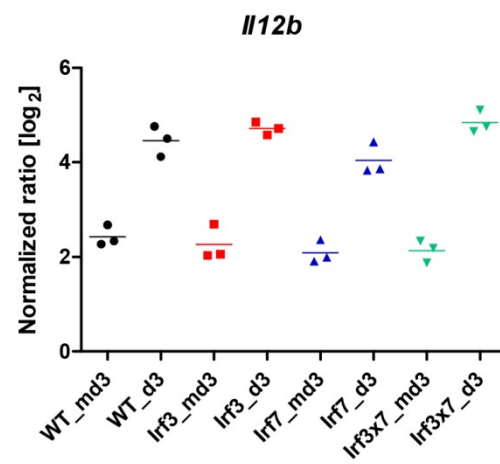

• C57BL/6J mice  
 ■ *Irf3*<sup>-/-</sup> mice

▲ *Irf7*<sup>-/-</sup> mice  
 ▼ *Irf3*<sup>-/-</sup>*xIrf7*<sup>-/-</sup> mice

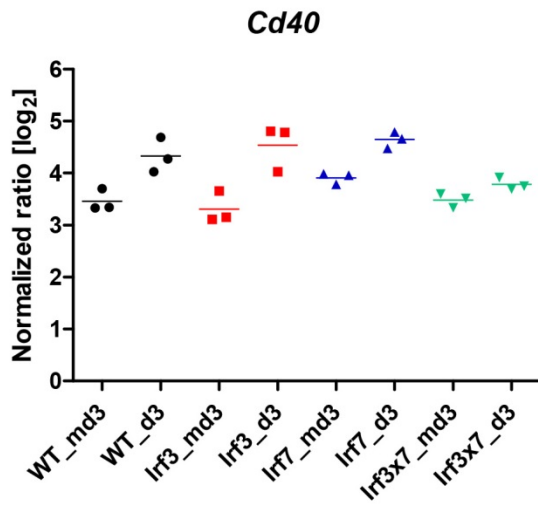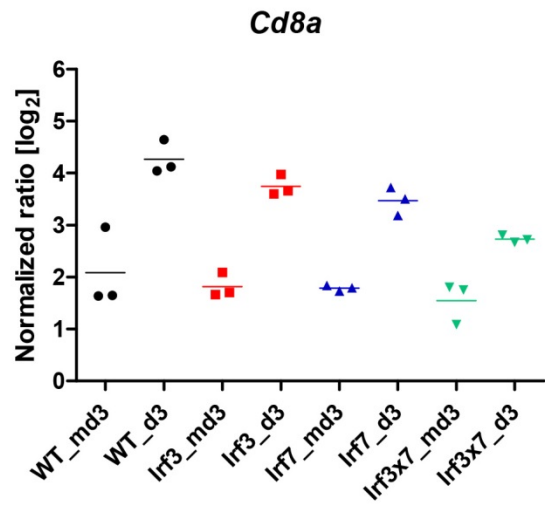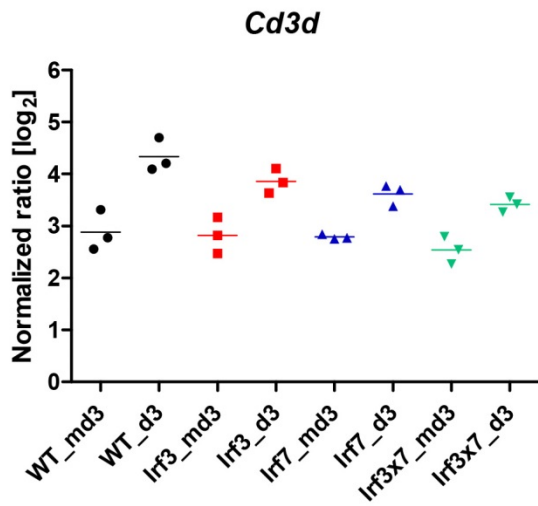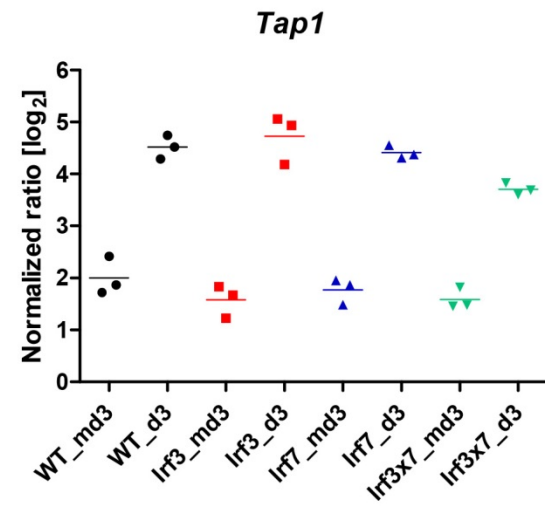

• C57BL/6J mice  
 ■ *Irf3*<sup>-/-</sup> mice

▲ *Irf7*<sup>-/-</sup> mice  
 ▼ *Irf3*<sup>-/-</sup>*xIrf7*<sup>-/-</sup> mice

**Supplement Table 1: Primer sequences for qRT-PCR**

| No. | Primer name | Sequence (5' - 3')       | Note                            |
|-----|-------------|--------------------------|---------------------------------|
| 1   | Ifna4-F     | CAAGCCATCCTTGTGCTAAGAG   | *                               |
| 2   | Ifna4-R     | GGAGGTTCCCTGCATCACACAG   | *                               |
| 3   | Ifnb1-F     | CCAGCTCCAAGAAAGGACGAAC   | (Takaki et al., 2013, modified) |
| 4   | Ifnb1-R     | CTTCTCCGTCATCTCCATAGGG   | (Daffis et al., 2007)           |
| 5   | Ifnl2/3-F   | GCCACATTGCTCAGTTCAAG     | *                               |
| 6   | Ifnl2/3-R   | GCACCTCATGTCTTCTCAAG     | *                               |
| 7   | Il6-F       | TACTTCACAAGTCCGGAGAGG    | *                               |
| 8   | Il6-R       | TCCACGATTTCCCAGAGAAC     | *                               |
| 9   | Ccl5-F      | TCGTGTTTGTCACTCGAAGG     | *                               |
| 10  | Ccl5-R      | CCCTCTATCCTAGCTCATCTCC   | (Lazear et al., 2013, modified) |
| 11  | Cxcl9-F     | CTCGGCAAATGTGAAGAAGC     | *                               |
| 12  | Cxcl9-R     | GACGACTTTGGGGTGTGTTTG    | *                               |
| 13  | Cxcl10-F    | GGTCTGAGTGGGACTCAAGG     | *                               |
| 14  | Cxcl10-R    | GTGGCAATGATCTCAACACG     | *                               |
| 15  | Rsad2-F     | ACACAGCCAAGACATCCTTCG    | (Lazear, 2013, modified)        |
| 16  | Rsad2-R     | CAAGTATTCACCCCTGTCCTG    | (Lazear, 2013)                  |
| 17  | Ifit1-F     | GAGCCAGAAAACCCTGAGTAC    | (Daffis et al., 2007, modified) |
| 18  | Ifit1-R     | TTAACCGGACAGCCTTCCTC     | *                               |
| 19  | Map2k4_F    | CAGTGGACAGCTTGTGGACT     | *                               |
| 20  | Map2k4_R    | CTCCAGACATCAGAGCGGAC     | *                               |
| 21  | Mapk8_F     | GAGAAACTGTTCCCCGATGTGC   | *                               |
| 22  | Mapk8_R     | TCCCTCTCATCTAACTGCTTGTC  | *                               |
| 23  | Atf2_F      | GCCATGGCAGTGGATTGGTTAG   | *                               |
| 24  | Atf2_R      | GACGGCCACTTGTATTTTGGG    | *                               |
| 25  | Ila_F       | CTGCCATTGACCATCTCTCTCTG  | *                               |
| 26  | Ila_R       | GACGTTGCTGATACTGTCACC    | *                               |
| 27  | Il1b-F      | GGGCCTCAAAGGAAAGAATC     | *                               |
| 28  | Il1b-R      | TACCAGTTGGGGAACCTCTGC    | *                               |
| 29  | Il12b_F     | CTTTGTTTGAATCCAGCGCAAG   | *                               |
| 30  | Il12b_R     | GTAATAGCGATCCTGAGCTTGC   | *                               |
| 31  | Cd40_F      | GCTATGGGGCTGCTTGTGTA     | (Morgado et al., 2014)          |
| 32  | Cd40_R      | ATGGGTGGCATTGGGTCTTC     | *                               |
| 33  | Cd8a_F      | TCGTGCCAGTCCTTCAGAAAG    | *                               |
| 34  | Cd8a_R      | TATCACAGGCGAAGTCCAATCC   | *                               |
| 35  | Cd3d_F      | ACACTCAACTTGGGCAAAGG     | *                               |
| 36  | Cd3d_R      | CACACAGTTCTGGCACATTCG    | *                               |
| 37  | Tap_F       | GTTCTCTACCAGCTTCAGTTCACC | *                               |
| 38  | Tap_R       | GGAAGTCCACAAGGCCTTTCATG  | *                               |
| 39  | Rpl4-F      | CGAAAAGGGAGAGTCATCTGG    | *                               |
| 40  | Rpl4-R      | CCAATTCAGTACGGCATAGG     | *                               |



**Note:** \* These primers were designed based on ENSEMBL mouse database, Primer3Plus and Primer-BLAST ([http://www.ensembl.org/Mus\\_musculus/Info/Index](http://www.ensembl.org/Mus_musculus/Info/Index), <http://www.primer3plus.com>, and <http://www.ncbi.nlm.nih.gov/tools/primer-blast>).

## References

- Daffis, S. et al. (2007). Cell-specific IRF-3 responses protect against West Nile virus infection by interferon-dependent and -independent mechanisms. *PLoS Pathog*, 3(7), e106. doi: 10.1371/journal.ppat.00301
- Lazear, H. et al. (2013). IRF-3, IRF-5, and IRF-7 coordinately regulate the type I IFN response in myeloid dendritic cells downstream of MAVS signaling. *PLoS Pathog*, 9(1), e1003118. doi: 10.1371/journal.ppat.1003118
- Morgado, P. et al. (2014). Type II *Toxoplasma gondii* Induction of CD40 on infected macrophages enhances interleukin-12 responses. *Infect Immun*, 82(10), 4047–4055. doi: 10.1128/IAI.01615-14
- Takaki et al. (2013). The MyD88 pathway in plasmacytoid and CD4+ dendritic cells primarily triggers type I IFN production against measles virus in a mouse infection model. *J Immunol*, 191(9), 4740–4747. doi: 10.4049/jimmunol.1301744
